1 Stratified Linkage Disequilibrium Score Regression reveals enrichment of eQTL effects  
2 on complex traits is not tissue specific

3

#### 4 **Authors**

5 Hill F. Ip, <sup>1\*</sup> Rick Jansen, <sup>2</sup> Abdel Abdellaoui, <sup>1</sup> Meike Bartels, <sup>1,3,4</sup> Dorret I. Boomsma, <sup>1,3,4</sup> & Michel G.  
6 Nivard<sup>1\*\*</sup>

7

#### 8 **Affiliations**

9 <sup>1</sup> Department of Biological Psychology, Vrije Universiteit Amsterdam, Amsterdam, North-Holland,  
10 1081 BT, the Netherlands

11 <sup>2</sup> Department of Psychiatry, VU University Medical Center, Amsterdam, North-Holland, 1081 HL, the  
12 Netherlands

13 <sup>3</sup> Amsterdam Public Health Research Institute, Amsterdam, North-Holland, 1081 BT, the Netherlands

14 <sup>4</sup> Neuroscience Amsterdam, Amsterdam, North-Holland, 1081 HV, the Netherlands

15

#### 16 **Corresponding authors**

17 \* [h.f.ip@vu.nl](mailto:h.f.ip@vu.nl)

18 \*\* [m.g.nivard@vu.nl](mailto:m.g.nivard@vu.nl)

19

20

21

22

23

24

25

## 26 **Abstract**

27 Both gene expression levels and eQTLs (expression quantitative trait loci) are partially tissue specific,  
28 complicating the detection of eQTLs in tissues with limited sample availability, such as the brain.  
29 However, eQTL overlap between tissues might be non-trivial, allowing for inference of eQTL  
30 functioning in the brain via eQTLs measured in readily accessible tissues, e.g. whole blood. Using  
31 Stratified Linkage Disequilibrium Score Regression (SLDSR), we quantify the enrichment of blood and  
32 brain eQTLs in genome-wide association study (GWAS) for three immune-related traits (Crohn's  
33 disease, rheumatoid arthritis, and ulcerative colitis), three brain-related (BMI, educational  
34 attainment, and schizophrenia), and five traits not associated with either tissue. Our analyses  
35 establish strong enrichments of blood (32-113 fold enrichment, mean=59) and brain (21-63 fold  
36 enrichment, mean=40) eQTLs in their effects across all traits. We find no evidence for tissue-specific  
37 enrichment in GWAS signal for either eQTLs uniquely found in the brain or whole blood. To extend  
38 our finding, we test tissue-specific enrichment of eQTLs discovered in 44 tissues by the Genotype-  
39 Tissue Expression (GTEx) consortium, and, again, find no tissue-specific eQTL effects. Finally, we  
40 integrate the GTEx eQTLs with tissue-specific epigenetic data and find substantially enriched effects  
41 on schizophrenia, though again not tissue specific. We conclude that, while eQTLs are strongly  
42 enriched in GWAS, the enrichment is not specific to the tissue used in eQTL discovery. Therefore,  
43 using relatively accessible tissues, such as whole blood, as proxy for eQTL discovery is sensible; and  
44 restricting lookups for GWAS hits to a specific tissue might not be advisable.

45

## 46 **Introduction**

47 The main aim of Genome-wide association studies (GWASs) is to detect statistically significant  
48 associations between genetic variants, such as single nucleotide polymorphisms (SNPs), and a trait  
49 of interest.<sup>1</sup> GWASs have identified many genetic variants and thereby provided insights into the  
50 genetic architecture of complex traits.<sup>1,2</sup> However, as a large number of variants identified through

51 GWASs are located outside of coding regions and specific knowledge of regulatory elements is  
52 limited, uncovering a relationship between GWAS hits and biological function has proven to be  
53 complicated.<sup>3</sup> Expression quantitative trait loci (eQTLs) are SNPs that influence gene expression, and  
54 are not necessarily located in coding regions. eQTLs may aid functional annotation of SNPs that have  
55 been identified in a GWAS and are located outside of coding regions.<sup>3,4</sup> Previous work has found  
56 substantial enrichment of eQTLs among GWAS hits and an enrichment in their genome-wide effect  
57 on complex traits.<sup>5-8</sup> Therefore, eQTLs are viewed as an important tool in moving from genome-wide  
58 association to biological interpretation.

59         As a result of difference in gene expression between cells originating from different tissues,  
60 eQTLs are potentially tissue specific.<sup>9,10</sup> Tissue-specificity poses no problem if the tissue of interest is  
61 readily available for research, such as whole blood. However, discovery of eQTLs gets complicated  
62 when measurement of expression levels in a tissue is limited by ethical and practical considerations,  
63 for example in brain tissue. Several studies have shown that the overlap between eQTLs from  
64 different tissues might actually be larger than initially assumed.<sup>11,12</sup> The Genotype-Tissue Expression  
65 (GTEx) consortium identified eQTLs in a wide range of human tissues and showed that 54-90% of the  
66 eQTLs identified in one tissue are also designated as an eQTL in at least one other tissue.<sup>10</sup> In  
67 another study, Liu *et al* found a high average pairwise genetic correlation ( $r_g=0.738$ ) of local gene  
68 expression between tissues.<sup>13</sup> Nevertheless, small differences in terms of eQTL effect may be of  
69 considerable importance in terms of the effects of eQTLs on complex traits related to specific tissues.  
70 It is worthwhile to investigate the specific utility of tissue-specific eQTLs in their effect on complex  
71 traits, as studied in GWAS. It is plausible that the discovery of eQTLs for tissues such as the brain can  
72 be advanced by eQTLs discovered in more accessible tissues, such as whole blood. The use of  
73 accessible tissues, though, depends on a substantial degree of similarity of eQTL effect across tissue,  
74 and to what extent eQTL differences between tissues are important in complex trait etiology.

75         Stratified Linkage Disequilibrium Score Regression (SLDSR) is a technique that estimates the  
76 SNP-heritability ( $h^2_{SNP}$ ) of a trait based on GWAS summary statistics.<sup>14,15</sup> By simultaneously analyzing

77 multiple categories of SNPs (annotations), SLDSR can also partition  $h^2_{SNP}$  by annotation ( $h^2_{annot}$ ) and  
78 thereby provides a way to jointly quantify the enrichment in GWAS signal of several annotations.  
79 Here, we extend SLDSR by including annotations containing *cis*-eQTLs from several tissues, i.e. eQTLs  
80 located closely to the gene with which they associate.<sup>16,17</sup> To this end, we perform analyses based on  
81 representative eQTL resources, and consider a variety of traits as outcomes.

82 First, we selected the strongest eQTLs per gene discovered in large samples of measures  
83 taken in whole blood and brain.<sup>17-19</sup> We quantify the contribution of these blood and brain eQTLs to  
84 the genetic variance in complex traits captured in GWAS. We then attempt to detect tissue-specific  
85 eQTL effects on complex traits by estimating the enrichments of eQTLs uniquely found in whole  
86 blood or uniquely found in brain, conditional on the enrichment of the complete blood eQTL  
87 annotation or complete brain eQTL annotation, respectively. We consider the effect of eQTLs on  
88 three brain-related phenotypes: schizophrenia (MIM: 181500), BMI (MIM: 606641), and educational  
89 attainment; three immune disorders: Crohn's disease (MIM: 266600), rheumatoid arthritis (MIM:  
90 180300), and ulcerative colitis (MIM: 266600); and five assorted traits and disorders: age at  
91 menarche (MIM: 612882), coronary artery disease (MIM: 607339), height (MIM: 606255), LDL levels,  
92 and smoking behavior (MIM: 188890).

93 Second, we retrieve all eQTLs identified in any of the 44 tissues from the GTEx consortium.<sup>10</sup>  
94 We consider the enrichment in GWAS signal of the union of all GTEx eQTLs, and, additionally, the  
95 enrichment of tissue-specific eQTL effects on top of the union of all GTEx eQTLs. We expect to  
96 observe tissue-specific enrichment of eQTLs in their effects on complex traits related to the tissue in  
97 question, e.g. eQTLs discovered in immune-related tissues are expected to show higher enrichments  
98 in their effect on immune-related traits compared to eQTLs found in skin tissue. We consider tissue-  
99 specific enrichment of *cis*-eQTLs in their effect on schizophrenia (a disorder where there is strong  
100 prior evidence for the involvement of processes in the brain) and rheumatoid arthritis (a disease  
101 with strong prior evidence for the involvement of processes in immune tissue). We further consider

102 the enrichment of the intersection of *cis*-eQTLs discovered in any tissue, and histone modification in  
103 a specific tissue (i.e. tissue-specific epigenetically changed chromatin states in regulatory regions).

104 Our analyses are designed to elucidate the relation between eQTLs and complex traits, and  
105 to quantify the extent to which this relation is dependent on the tissue used in eQTL discovery. Our  
106 analysis further considers the enrichment of genomic regions related to gene expression and  
107 epigenetically modified in specific tissues.

108

## 109 **Material and Methods**

### 110 **SLDSR method**

111 A measure of linkage disequilibrium (LD) for each SNP, called an “LD score”, can be computed by  
112 taking the sum of correlations between that SNP and all neighboring SNPs.<sup>14,15</sup> Under a polygenic  
113 model, LD scores are expected to show a linear relationship with GWAS test statistics of  
114 corresponding SNPs, where the slope is proportional to  $h^2_{\text{SNP}}$ . For SLDSR, LD scores are based on only  
115 (functional) parts of the genome and used as predictors in a multiple linear regression.<sup>15</sup> In this  
116 manner, SLDSR is able to partition  $h^2_{\text{SNP}}$  into parts that are explained by these parts of the genome  
117 (i.e.  $h^2_{\text{annot}}$ ), while accounting for influences of the remaining annotations in the model. The  
118 enrichment of an annotation is then obtained by taking the ratio of  $h^2_{\text{annot}}$  over the proportion of  
119 SNPs that fall within that annotation.

120

### 121 **Target traits**

122 As outcome for SLDSR, we used summary statistics of GWASs on Crohn’s disease,<sup>20</sup> rheumatoid  
123 arthritis,<sup>21</sup> ulcerative colitis,<sup>20</sup> BMI,<sup>22</sup> educational attainment,<sup>23</sup> schizophrenia,<sup>24</sup> age at menarche,<sup>25</sup>  
124 coronary artery disease,<sup>26</sup> height,<sup>27</sup> LDL levels,<sup>28</sup> and smoking behavior.<sup>29</sup> The first three traits were  
125 chosen because they are related to the immune system and are therefore expected to reveal  
126 considerable enrichment of blood eQTL signal.<sup>20,21</sup> Similarly, brain eQTLs are expected to show  
127 substantial enriched effects due to previous reports on the involvement of the central nervous

128 system (CNS) in schizophrenia,<sup>24</sup> educational attainment,<sup>23</sup> and BMI.<sup>30</sup> Of course, these traits do not  
129 perfectly align with either tissue, e.g. the immune system has been implicated in the etiology of  
130 schizophrenia and BMI,<sup>31,32</sup> and might therefore also be enriched in their effects for the other eQTL  
131 set. However, this is expected to occur at lower rates. Enrichment of blood and brain eQTL effects on  
132 the remaining traits was calculated to contrast the results with traits for which we do not have a  
133 strong *a priori* expectation of the relationship between trait and tissue.

134 The discovery sample for detection of blood eQTLs included participants from the  
135 Netherlands Twin Register (NTR) and Netherlands Study of Depression and Anxiety (NESDA).<sup>18,19,33–35</sup>  
136 Subjects from these studies, not necessarily the same ones, also participated in the GWAS for some  
137 of the traits examined.<sup>22,23,25,27–29</sup> To ensure that the discovery sample did not affect estimates of  
138 enrichments of eQTL effects in the various GWAS signals, we looked at trait-specific enrichment of  
139 blood and brain eQTL signal in GWAS signal for educational attainment and smoking behavior. We  
140 compared the results from using publicly available datasets with using summary statistics based on  
141 the same sample without subjects from the NTR or NESDA. The results did not reveal appreciable  
142 differences between the respective datasets (S1 Figure), therefore the remaining analyses for all  
143 traits with participants from the NTR or NESDA (age at menarche, BMI, educational attainment,  
144 height, LDL level, and smoking behavior) were performed using publicly available summary statistics.

145

#### 146 **Blood and brain eQTL enrichment**

147 A catalog of whole blood *cis*-eQTLs was obtained from Jansen *et al*,<sup>18,19</sup> where the eQTL most  
148 strongly associated with gene expression in whole blood for each probe set was selected for  
149 inclusion in our whole blood eQTL annotation. A list of brain eQTLs was obtained from Ramasamy *et*  
150 *al*,<sup>17</sup> whom studied eQTL effects in 12 distinct brain regions. We included all eQTLs which were found  
151 to significantly associate to average gene expression across all 12 brain tissues. SLDSR annotations  
152 were constructed as per the instructions of Bulik-Sullivan and Finucane.<sup>36</sup> To guard against upward  
153 bias in the eQTL enrichment signal, two extra annotations containing SNPs within a 500 base pair (bp)

154 and 100bp window around any eQTL were constructed for each eQTL set.<sup>15</sup> Finally, to ensure that  
155 the enrichment of eQTL effects in GWAS signal was not in fact caused by their proximity to the genes  
156 they influence, six additional “gene-centric” annotations were constructed per eQTL set. These  
157 annotations included all SNPs that were located in a gene promoter, coding region, or intron and  
158 their corresponding 500bp windows that were also within 1Mbp window from any blood or brain  
159 eQTL.

160

### 161 **Tissue-specific eQTL enrichment**

162 The availability of eQTLs from two tissues allowed for the consideration of eQTLs unique to either  
163 blood or brain gene expression, and those that overlap between the two tissues. We modeled the LD  
164 between the SNPs of the blood and brain eQTL annotations as a mixture of normal densities.  
165 Subsequently, we determined the tissue specificity of each eQTL based on the posterior probability  
166 of belonging to a class of SNPs in weak LD with the eQTLs in the other tissue (see appendix A1 for a  
167 full model description and results). Based on the split sets of eQTLs, we constructed two additional  
168 LD score annotations. The first annotation contained all eQTLs uniquely found in whole blood, and  
169 the second contained all eQTLs unique to brain. Here, we assume LD to be a good proxy for the co-  
170 localization of eQTLs. Strong LD does not guaranty that the blood and brain eQTL in strong LD tag the  
171 same underlying causal SNP effect on gene expression. However, given that our research question  
172 focuses on genome-wide enrichment, this metric of co-localization between brain and blood eQTLs  
173 was the optimal approach.

174 In the presence of tissue-specific eQTL effects, we expect eQTLs *unique* to a tissue to not be  
175 differentially enriched when compared to all eQTLs found in a tissue when the trait is related to that  
176 particular tissue (e.g. blood eQTLs are enriched in their effects on rheumatoid arthritis, regardless of  
177 their LD with brain eQTLs). We further expect eQTLs *unique* to a tissue to be *depleted* in their effect  
178 on traits not related to that particular tissue, when compared to eQTLs also found in a trait-relevant

179 tissue (e.g. blood eQTLs are expected to have an effect on educational attainment, but only if they  
180 are in strong LD with brain eQTLs).

181

## 182 **Enrichment of eQTLs from 44 tissues**

183 There are two limitations to above mentioned analyses of tissue-specific enrichments of eQTL  
184 effects in GWAS signal. First, the eQTLs are obtained from two different projects, which vary in terms  
185 of sample size and their definition of an eQTL. Second, both projects identified lead eQTLs (i.e. the  
186 statistically strongest eQTL out of many significant eQTL SNPs), which means annotations based on  
187 these lists of hits contained a very small portion of the SNPs in the genome, possibly limiting power  
188 in SLDSR. To mitigate these limitations, we performed additional analyses using eQTLs obtained by a  
189 common pipeline from 44 tissues (see S2 Table) and based on a broader eQTL locus definition.<sup>10</sup> For  
190 each of the 44 tissues, we made an annotation for analysis in SLDSR following the previously  
191 described procedure. Analogous to the procedure of Finucane *et al* for cell-type-specific analysis  
192 using SLDSR,<sup>15</sup> we additionally made an annotation that contained all GTEx eQTLs, i.e. a SNP would  
193 be included in this annotation if it was designated as part of at least one of the 44 tissue-specific  
194 GTEx annotations, and added a 100bp and 500bp window. No windows were made for the tissue-  
195 specific GTEx annotations. Using GWAS summary statistics for schizophrenia, we then ran one SLDSR  
196 model containing only the baseline categories and the union of GTEx eQTLs, and 44 additional  
197 models with the two previous annotations and one of the tissue-specific GTEx annotations at a time.  
198 We repeated the procedure using summary statistics for rheumatoid arthritis.

199         GTEx has relative small sample sizes for the brain eQTL discovery (mean=89 sample size,  
200 range=72-103) compared to other tissues (mean=160 sample size, range=70-361).<sup>10</sup> To investigate  
201 the effect of differences in sample size on estimates of enrichments in GWAS signal, we collapsed  
202 the union of individual brain eQTL annotations into a shared brain eQTL annotation (i.e. an eQTL  
203 found in at least one of the GTEx brain annotations was included in the shared brain eQTL



204 annotation). This annotation was then analyzed as an additional GTEx eQTL annotation. We further  
205 tested the relationship between tissue sample size and tissue eQTL enrichment.

206

## 207 **Enrichment of the intersection between eQTLs and histone marks**

208 The availability of annotations based on tissue-specific histone marks made it possible to create an  
209 annotation that represents the intersection between eQTLs and epigenetic modification related to  
210 enhancers and promoters of actively transcribed genes. We obtained LD score annotations of SNPs  
211 in regions that bare histone marks in cells from the CNS or immune system from Finucane *et al.*<sup>15</sup>  
212 Out of the 220 available cell-type-specific histone mark, 101 were found in the CNS or immune  
213 tissues. For each of the 101 annotations of SNPs in cell-type-specific histone marks, we extracted its  
214 intersection with the union of GTEx eQTLs and made a new annotation of eQTLs which intersected  
215 with histone marks (i.e. SNPs found in both annotations). We then analyzed each of the intersection  
216 annotations individually in a model together with the baseline categories, the union of GTEx eQTLs,  
217 and the corresponding cell-type-specific histone marks. Enrichments in GWAS signal of the  
218 intersection should be interpreted as enrichment of genome-wide SNP effects on a complex trait  
219 beyond the additive effects which work on all SNPs that are a *cis*-eQTL and histone mark in question.  
220 In fact, we test whether the interaction between tissue-specific chromatin state and eQTLs are  
221 enriched in their genome-wide effect on complex traits.

222

## 223 **Results**

### 224 **Blood and brain eQTL enrichment**

225 We fitted an SLDSR model containing the baseline categories; the complete annotation for both  
226 brain and blood eQTL tissues, their 100 and 500bp windows, and gene-centric annotations to all 11  
227 GWAS traits (Crohn's disease, rheumatoid arthritis, ulcerative colitis, BMI, educational attainment,  
228 schizophrenia, age at menarche, coronary artery disease, height, LDL levels, and smoking behavior).  
229 Our analyses revealed substantial enrichment of both blood (32-113 fold enrichment, mean=59) and

230 brain (21-63, mean=40) eQTL effects in GWAS signals for all traits (Figure 1, S3 Table), exceeding  
231 enrichments of any of the baseline categories considered by Finucane *et al.*<sup>15</sup> Additionally, the  
232 coding region gene-centric annotation for both blood and brain eQTLs showed considerable  
233 enrichment in GWAS signal. Similar to Finucane *et al.*<sup>15</sup> the average enrichment in the “Enhancer  
234 Andersson”-annotation (called “FANTOM5 enhancer” in Finucane *et al.*) is largely determined by the  
235 relatively high enrichments of GWAS signal in the three immune-related traits (red dots in Figure 1).  
236 These traits behave similarly in blood eQTLs and its gene-centric annotations, but not in brain eQTLs.  
237 Further inspection showed additional differences between the brain and blood eQTL sets in the  
238 three immune traits: in these traits, blood eQTLs were roughly 73–113 times enriched in their effect  
239 on GWAS signal, but only showed a 21-38-fold enrichment in GWAS signal for brain eQTLs (see S4  
240 Table). The distinction between the two eQTL sets was less prominent for brain-related traits: brain  
241 eQTLs were 57 times enriched in their effect on educational attainment, and only showed a 34-37-  
242 fold enrichment for schizophrenia and BMI. Blood eQTLs showed a 38-45-fold enriched effect. The  
243 brain traits seem to behave similarly to traits without prior expectation on tissue-specific eQTL  
244 enrichment for either blood or brain (32-65 and 30-63, respectively).

245       Where the significance level associated with the enrichments do not account for the  
246 presence of the other annotations in the model, the significance test associated with the coefficient  
247 is corrected for the influence of the additional annotations. The Z-score for the coefficient allows us  
248 to determine the enrichment of SNPs in a particular annotation in their effect on complex traits is  
249 significant, conditional on the other annotation in the model. Results are largely as expected: blood  
250 eQTLs contribute substantially to  $h^2_{\text{SNP}}$  in rheumatoid arthritis and ulcerative colitis (though not  
251 statistically significant); whereas brain eQTLs do the same for all three brain-related traits (see  
252 supplemental S5 Table). The blood eQTL annotation further reached statistical significance for  
253 schizophrenia and BMI, while the same was seen for brain eQTLs in Crohn’s disease.

254

255 **Enrichment of eQTLs unique to, and shared between blood and brain tissue**

256 We fitted an SLDSR model for all 11 GWAS traits, containing the baseline categories, the complete  
257 blood eQTL annotation, its corresponding 100 and 500bp windows, and gene-centric annotations, as  
258 well as unique blood eQTLs (blood eQTLs not identified in the brain). The same was done using the  
259 complete brain eQTL annotation, and corresponding windows and gene-centric annotations. By  
260 definition, all the SNPs within the unique eQTL annotations are also part of their respective complete  
261 eQTL annotation. Adding both annotations simultaneously to the model will result in an estimate of  
262 enrichment or depletion of *cis*-eQTLs *unique* to a tissue on top of the enrichment of all eQTLs in the  
263 tissue.

264 Results for models which include both the complete blood eQTL annotation and the unique  
265 blood eQTLs are in table 1. For all the immune-related traits, unique blood eQTLs were neither  
266 enriched nor depleted in their genome-wide effects beyond the complete blood eQTL annotation.  
267 For the brain-related traits, unique blood eQTLs showed depletion in GWAS signal for schizophrenia  
268 and educational attainment, but not for BMI.

269 Unique brain eQTLs were not significantly depleted compared to brain eQTLs in strong LD  
270 with blood eQTLs in their effect on all three immune-traits (Table 1 left panel). Unique brain eQTLs  
271 were significantly depleted in their effect on schizophrenia and educational attainment compared to  
272 the complete brain eQTL annotation, but not for BMI. Informed by the unexpected depletion of  
273 enrichment in GWAS signal for unique brain eQTLs in brain-related traits, but not immune traits, we  
274 tested whether brain eQTLs in strong LD with blood eQTLs influenced gene expression in more brain  
275 regions than unique brain eQTLs. On average, brain eQTLs in strong LD with blood eQTLs were found  
276 to influence gene expression in 2.81 regions, whereas unique brain eQTLs influenced gene  
277 expression in 2.43 brain regions ( $t=4.20$ ,  $df=1967$ ,  $p<3*10^{-5}$ ). These results indicated that cross-tissue  
278 LD between blood and brain eQTLs was weakly informative on cross-tissue eQTL effects across  
279 different brain regions.

280

281 **Enrichment of eQTLs from 44 tissues in GTEx**

282 We interrogate the enrichment of the union of GTEx eQTLs and 44 tissue-specific GTEx annotations  
283 in their effect on schizophrenia and rheumatoid arthritis. Figure 2 shows the coefficient Z-scores of  
284 the 45 GTEx annotations, sorted from largest to smallest. In both cases, the union of GTEx eQTLs has  
285 a substantial Z-score ( $Z=5.501$  and  $Z=3.802$  for schizophrenia and rheumatoid arthritis, respectively,  
286 both  $p<0.001$ , S6 Table), indicating that eQTLs in general are significantly enriched in their effects on  
287 complex traits. The tissue-specific annotations, however, perform notably worse and in some cases  
288 even suggest depletion of genome-wide effects of tissue-specific eQTLs on schizophrenia and  
289 rheumatoid arthritis. For rheumatoid arthritis, the coefficient Z-scores of the whole blood  
290 annotation reached nominal significance ( $Z=2.036$ ,  $p=0.021$ ), but failed correction for multiple  
291 testing. None of the other annotations reached nominal significance. The union of all GTEx brain  
292 annotations did not contribute significantly to explaining  $h^2_{\text{SNP}}$  ( $Z=0.147$ ,  $p=0.441$ ). Sample size in the  
293 eQTL discovery phase appears to be a strong determinant of tissue-specific enrichment in GWAS  
294 signal. The correlation coefficients between the coefficient Z-scores and sample sizes were 0.6453  
295 ( $p=2.253 \times 10^{-6}$ ) and 0.4247 ( $p=0.004$ ) for schizophrenia and rheumatoid arthritis, respectively.

296

### 297 **Enrichment of the intersection between eQTLs and histone marks**

298 We interrogate the intersection of eQTLs and histone marks found in specific CNS and immune cells,  
299 and estimate the enrichment of the intersection in its effect on rheumatoid arthritis and  
300 schizophrenia. We find significant enrichment in GWAS signal for eQTLs that intersect with histones  
301 that bare modification H3K4me1, a modification thought to be present in the enhancer of actively  
302 transcribed genes,<sup>37,38</sup> in CNS cells for schizophrenia (see Figure 3). The results are further  
303 idiosyncratic in that there is some evidence for significant enrichment of eQTLs that intersect with  
304 immune cells baring the H3K4me1 mark in their effect on schizophrenia, but not on rheumatoid  
305 arthritis. Specifically, none of the intersecting annotations show evidence of enrichment for  
306 rheumatoid arthritis. For the separate annotations, we find significant enrichment in GWAS signal  
307 across all histone marks found in CNS cells and three significant immune cell-types that bare the

308 H3K4me3 modification, a modification associated with transcriptional start sites and promoters of  
309 actively transcribed genes,<sup>37,38</sup> for schizophrenia (S7 Figure). The opposite picture was seen for  
310 rheumatoid arthritis: a wide variety of immune-cell specific histone marks showed significant  
311 enrichments in GWAS signal, while all marks found in CNS cells were below zero. The union of GTEx  
312 eQTLs reached statistical significance for all models (S8 Figure).

313

## 314 Discussion

315 Stratified Linkage Disequilibrium Score Regression provides a way to partition  $h^2_{\text{SNP}}$  into parts  
316 explained by (functional) parts of the genome.<sup>15</sup> A “full baseline model” containing 24 non-cell-type-  
317 specific annotations of SNPs, such as SNPs located in promoters or coding regions, was developed  
318 previously for analysis using SLDSR. Here, we go beyond the baseline categories by adding  
319 annotations containing eQTLs derived from whole blood and brain tissue into the model, and  
320 showed that eQTLs were substantially stronger enriched in their effect on complex traits compared  
321 to all categories considered by Finucane *et al.*<sup>15</sup> The complete brain eQTL annotation was  
322 significantly enriched in GWAS signal for BMI and schizophrenia, and was consistent with previous  
323 estimates of eQTL effect enrichment.<sup>8</sup> Considerable enrichment for eQTLs, even for traits not  
324 apparently linked to the brain or immune system (e.g. coronary artery disease), suggested that non-  
325 trivial eQTL overlap across tissues might be present.

326 Inclusion of both brain and blood eQTLs into the SLDSR model did not fully separate the  
327 signal into tissue-specific effects, as shown by the roughly equal enrichments of both annotations  
328 within brain-related traits. Using LD scores to inform a mixture-based separation of the eQTL sets  
329 yielded an incomplete separation of tissue-specific enrichment. In general, we are not able to clearly  
330 identify tissue-specific eQTL signals using these datasets and SLDSR. Our second analysis of eQTL  
331 enrichment based on 44 tissue-specific *cis*-eQTL sets, obtained from the GTEx consortium, confirms  
332 the lack of tissue-specific eQTL enrichment. While an annotation containing all eQTLs identified in  
333 GTEx is significantly enriched ( $Z=5.501$  and  $Z=3.802$  for schizophrenia and rheumatoid arthritis,

334 respectively, both  $p < 0.001$ ), none of the analyzed brain tissues are enriched beyond all eQTLs in  
335 their effect on schizophrenia. Similarly, whole blood eQTLs are not significantly enriched beyond all  
336 GTEx eQTLs taken together in their effect on rheumatoid arthritis. Again, these findings are not  
337 consistent with the hypothesis of abundant tissue-specific eQTLs with effects on complex traits  
338 related to the specific tissue in question. Especially, when contrasted with tissue-specific gene  
339 expression levels and tissue-specific histone modifications,<sup>13,39</sup> tissue-specific eQTLs are of limited  
340 value in relating complex traits to a tissue. We do, however, find evidence for possible enrichment  
341 for eQTLs that intersect with tissue-specific H3K4me1 histone marks in the brain, but also immune  
342 cells, in their effect on schizophrenia but not rheumatoid arthritis. This means that eQTLs in  
343 H3k4me1 marks are enriched in their effect on schizophrenia above the expected enrichment based  
344 on the fact that these SNPs are both eQTLs and located in H3K4me1 histone marks. What is of  
345 substantial interest is that the enrichment in GWAS signal appears specific to H3K4me1 marks,  
346 suggesting that these marks specifically can aid in prioritizing genomic regions in which tissue-  
347 specific eQTLs may reside. Though, again, the totality of evidence is inconclusive on the relevance of  
348 tissue-specific eQTLs to variation in complex traits.

349 Our results are consistent with, and complimentary to, a study investigating the genetic  
350 correlation between gene expression levels across 15 tissues.<sup>13</sup> This study revealed substantial  
351 correlations between *cis*-genetic effects on gene expression across 15 tissues.<sup>13</sup> Our analyses confirm  
352 the value of using whole blood as discovery tissue for detection of eQTLs and further demonstrate  
353 the usefulness of techniques that use eQTLs discovered in whole blood to study the etiology of  
354 complex traits related to different tissues.<sup>40,41</sup> The results presented here highlight the overlap of *cis*-  
355 eQTL effects across tissues on a genome-wide level. However, the effect of a *cis*-eQTL might vary  
356 substantially across tissues for individual genes.<sup>42</sup> Our conclusions are based on genome-wide  
357 enrichments and therefore should not be interpreted as limited evidence for tissue-specific eQTL  
358 effects for individual genes. Therefore, eQTL discovery in the tissue most relevant to a specific trait  
359 or disorder remains important to further our understanding of the genetic regulation of tissue-

360 specific gene expression. What is also clear is that to find those tissue-specific eQTLs that are of  
361 relevance to the interpretation of GWASs of complex traits, tissue-specific eQTL discovery needs to  
362 be refined. The practice of, as a post-hoc analysis to GWAS, performing eQTL lookup in a specific  
363 tissue linked to a trait, when larger dataset for other accessible tissues are available may be sub  
364 optimal. In fact one may prefer to perform a lookup in the overlap between epigenetic modifications  
365 in a relevant tissue and eQTLs regardless of tissue. One can further consider utilizing eQTLs to link  
366 GWAS findings to a gene, and subsequently consider the differential expression of a gene to identify  
367 the tissue in which the gene is most likely to act in effecting the trait. Tissue-specific differential gene  
368 expression vastly outperforms eQTLs in tagging regions of the genome enriched in their effect on  
369 complex traits.<sup>39</sup>

370 It is also evident that a limited dichotomous definition of eQTL/no-eQTL may be insufficient  
371 to identify tissue-specific eQTL effects. An evident improvement would be to compute the difference  
372 in eQTL effect between tissues, and perform inference based on this difference in effect. eQTLs are  
373 strongly enriched SNPs, with clear biological function and utility for the translation of GWAS findings,  
374 though tissue-specific eQTL mechanisms remain elusive. The discovery of tissue-specific eQTL effects,  
375 which can aid in linking complex trait to tissue, may require novel research strategies.

376

## 377 **Appendices**

### 378 **A1. LD-based distinction between tissue-specific eQTLs and eQTLs in strong LD with eQTLs from** 379 **the other tissue.**

380 We attempted to separate the signal from all blood eQTLs collectively by looking at the degree of LD  
381 each blood eQTL has with all brain eQTLs. Fig A1 shows the distribution of LD scores for all blood  
382 eQTLs. A strong mass can be seen around 0 LD (eQTLs unique to whole blood) with a long tail to the  
383 right (blood eQTLs in [strong] LD with one or more brain eQTL[s]). To determine the cutoff value  
384 between unique blood eQTLs and those in (strong) LD with brain eQTLs, we analyzed the distribution  
385 of LD scores using the *normalmixEM*-function of the *mixtools* package in R.<sup>43</sup> This function

386 approximates the distribution of the LD scores using a mixture of a user-defined number of normal  
387 distributors. Based on their posterior probabilities, each eQTL is then assigned to one of the  
388 distributors. A five-class normal mixture distribution returned two components with a mean of  
389 roughly zero and three components that clearly deviated from zero (Table A). Fitting more than five  
390 mixture classes did not result in an appreciable different separation of blood eQTLs with near zero  
391 LD with brain eQTLs. Therefore, the results from fitting a five-class mixture were used to make the  
392 distinction, where the SNPs that had the highest posterior probability of belonging to one of the  
393 components with a mean LD near zero, i.e. the first two components, were considered unique blood  
394 eQTLs. Fig A2 shows the distribution of LD scores for brain eQTLs. Again, a strong mass around zero  
395 with a long tail to the right can be seen and fitting a mixture of five normal distributors resulted in  
396 optimal separation of unique brain eQTLs and brain eQTLs in (strong) LD with blood eQTLs (Table B).  
397 SNPs with the highest posterior probability of belonging to the first two components were  
398 categorized as unique brain eQTLs.

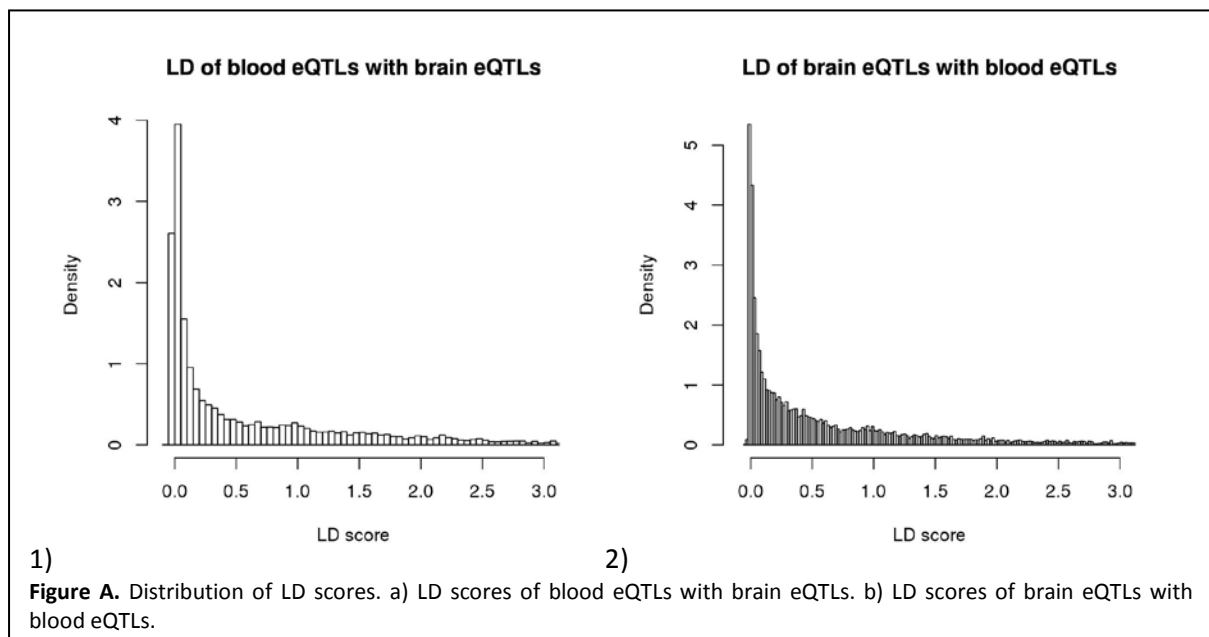

399

400

401

402

403 Table A. Results mixture modeling blood eQTLs.



---

|        | comp 1   | comp 2   | comp 3   | comp 4   | comp 5   |
|--------|----------|----------|----------|----------|----------|
| Lambda | 0,159244 | 0,220276 | 0,202397 | 0,346083 | 0,071999 |
| Mu     | 0,000063 | 0,037581 | 0,239015 | 1,267693 | 4,871118 |
| Sigma  | 0,004075 | 0,030574 | 0,137518 | 0,716810 | 3,328837 |

loglik at estimate: -4933,98

|        | comp 1    | comp 2   | comp 3   | comp 4   | comp 5   | comp 6   |
|--------|-----------|----------|----------|----------|----------|----------|
| Lambda | 0,145539  | 0,207641 | 0,186234 | 0,221515 | 0,196115 | 0,042957 |
| Mu     | -0,000245 | 0,029492 | 0,172924 | 0,738651 | 1,931109 | 6,179965 |
| sigma  | 0,003462  | 0,025442 | 0,097901 | 0,353329 | 0,868389 | 3,674714 |

loglik at estimate: -4526,028

|        | comp 1    | comp 2   | comp 3   | comp 4   | comp 5   | comp 6   | comp 7   |
|--------|-----------|----------|----------|----------|----------|----------|----------|
| lambda | 0,088138  | 0,152810 | 0,164436 | 0,161404 | 0,177390 | 0,215443 | 0,040379 |
| Mu     | -0,000528 | 0,007292 | 0,058076 | 0,231495 | 2,039302 | 0,834543 | 6,354239 |
| sigma  | 0,001545  | 0,011553 | 0,035202 | 0,114845 | 0,890447 | 0,374960 | 3,709027 |

loglik at estimate: -4253,795

---

404 Lambda indicates the proportion of SNPs falling within the component. Mu signifies the mean LD

405 score. Sigma represents the standard error around mu.

406

407

408

409

410

411

412

413

414

415

416

417

418 Table B. Results mixture modeling brain eQTLs.

---

|        | comp 1   | comp 2   | comp 3   | comp 4   | comp 5   |
|--------|----------|----------|----------|----------|----------|
| lambda | 0,139315 | 0,180625 | 0,276473 | 0,273498 | 0,130090 |
| mu     | 0,000225 | 0,045226 | 0,279774 | 0,986414 | 2,825510 |
| sigma  | 0,005331 | 0,033993 | 0,152244 | 0,466854 | 1,516570 |

loglik at estimate: -6336,214

|        | comp 1    | comp 2   | comp 3   | comp 4   | comp 5   | comp 6   |
|--------|-----------|----------|----------|----------|----------|----------|
| lambda | 0,123778  | 0,158111 | 0,156313 | 0,237922 | 0,205140 | 0,118735 |
| mu     | -0,000392 | 0,030385 | 0,143963 | 1,106905 | 0,407980 | 2,935880 |
| sigma  | 0,004401  | 0,025348 | 0,071816 | 0,481418 | 0,171124 | 1,529066 |

loglik at estimate: -6068,594

|        | comp 1    | comp 2   | comp 3   | comp 4   | comp 5   | comp 6   | comp 7   |
|--------|-----------|----------|----------|----------|----------|----------|----------|
| lambda | 0,121341  | 0,150736 | 0,155579 | 0,199655 | 0,121956 | 0,204690 | 0,046044 |
| mu     | -0,000462 | 0,133097 | 0,028572 | 0,374076 | 2,045583 | 0,938595 | 3,956472 |
| sigma  | 0,004272  | 0,066737 | 0,024453 | 0,153883 | 0,792295 | 0,366171 | 1,746882 |

loglik at estimate: -5907,881

---

419 Lambda indicates the proportion of SNPs falling within the component. Mu signifies the mean LD  
420 score. Sigma represents the standard error around mu.

421

## 422 Supplemental Data

423 Supplemental Data includes 3 figures and 5 tables

424

## 425 Acknowledgements

426 MGN is supported by the Royal Netherlands Academy of Science Professor Award (PAH/6635) to DIB.

427 HFI is supported by the "Aggression in Children: Unraveling gene-environment interplay to inform

428 Treatment and InterventiON strategies" (ACTION) project. ACTION receives funding from the

429 European Union Seventh Framework Program (FP7/2007-2013) under grant agreement no 602768.

430 MB is supported by a University Research Chair of the Vrije Universiteit. The discovery of blood eQTL

431 was funded by the US National Institute of Mental Health (RC2 MH089951, principal Investigator PFS)

432 as part of the American Recovery and Reinvestment Act of 2009. We thank T. Lehner (National

433 Institute of Mental Health) for his support. We acknowledge Hillary Finucane, Raymond Walters and  
434 Benjamin Neale for critical comments on our methods, design and manuscript.

435

## 436 **Web Resources**

437 Age at menarche summary statistics, [www.reprogen.org/data\\_download.html](http://www.reprogen.org/data_download.html)

438 Blood eQTLs, <https://eqtl.onderzoek.io/>

439 Brain eQTLs, <http://www.braineac.org/>

440 Coronary artery disease summary statistics, [www.cardiogramplusc4d.org/data-downloads/](http://www.cardiogramplusc4d.org/data-downloads/)

441 Crohn's disease and ulcerative colitis summary statistics, [www.ibdgenetics.org/downloads.html](http://www.ibdgenetics.org/downloads.html)

442 Educational attainment summary statistics, <http://www.thessgac.org/data>

443 Full baseline model LD scores, <http://data.broadinstitute.org/alkesgroup/LDSCORE/>

444 GTEx dataset, <http://www.gtexportal.org/home/datasets>

445 Height and BMI summary statistics,

446 [www.broadinstitute.org/collaboration/giant/index.php/GIANT\\_consortium\\_data\\_files](http://www.broadinstitute.org/collaboration/giant/index.php/GIANT_consortium_data_files)

447 LDL levels summary statistics, [www.broadinstitute.org/mpg/pubs/lipids2010/](http://www.broadinstitute.org/mpg/pubs/lipids2010/)

448 OMIM, <http://www.omim.org>

449 Rheumatoid arthritis summary statistics, <http://plaza.umin.ac.jp/yokada/datasource/software.htm>

450 Schizophrenia and smoking behavior summary statistics, [www.med.unc.edu/pgc/results-and-](http://www.med.unc.edu/pgc/results-and-downloads)

451 [downloads](http://www.med.unc.edu/pgc/results-and-downloads)

452 SLDSR software, <https://github.com/bulik/ldsc/>

453

## 454 **References**

455 1. Hirschhorn, J.N., and Daly, M.J. (2005). Genome-wide association studies for common diseases and  
456 complex traits. *Nat. Rev. Genet.* 6, 95–108.

457 2. Visscher, P.M., Brown, M.A., McCarthy, M.I., and Yang, J. (2012). Five Years of GWAS Discovery. *Am.*

- 458 J. Hum. Genet. *90*, 7–24.
- 459 3. Lowe, W.L., and Reddy, T.E. (2015). Genomic approaches for understanding the genetics of  
460 complex disease. *Genome Res.* *25*, 1432–1441.
- 461 4. Morley, M., Molony, C.M., Weber, T.M., Devlin, J.L., Ewens, K.G., Spielman, R.S., and Cheung, V.G.  
462 (2004). Genetic analysis of genome-wide variation in human gene expression. *Nature* *430*, 743–747.
- 463 5. Manolio, T.A., Collins, F.S., Cox, N.J., Goldstein, D.B., Hindorf, L.A., Hunter, D.J., McCarthy, M.I.,  
464 Ramos, E.M., Cardon, L.R., Chakravarti, A., et al. (2009). Finding the missing heritability of complex  
465 diseases. *Nature* *461*, 747–753.
- 466 6. Nicolae, D.L., Gamazon, E., Zhang, W., Duan, S., Dolan, M.E., and Cox, N.J. (2010). Trait-associated  
467 SNPs are more likely to be eQTLs: annotation to enhance discovery from GWAS. *PLoS Genet.* *6*,  
468 e1000888.
- 469 7. Torres, J.M., Gamazon, E.R., Parra, E.J., Below, J.E., Valladares-Salgado, A., Wacher, N., Cruz, M.,  
470 Hanis, C.L., and Cox, N.J. (2014). Cross-tissue and tissue-specific eQTLs: partitioning the heritability of  
471 a complex trait. *Am. J. Hum. Genet.* *95*, 521–534.
- 472 8. Davis, L.K., Yu, D., Keenan, C.L., Gamazon, E.R., Konkashbaev, A.I., Derks, E.M., Neale, B.M., Yang,  
473 J., Lee, S.H., Evans, P., et al. (2013). Partitioning the heritability of Tourette syndrome and obsessive  
474 compulsive disorder reveals differences in genetic architecture. *PLoS Genet.* *9*, e1003864.
- 475 9. Hernandez, D.G., Nalls, M.A., Moore, M., Chong, S., Dillman, A., Trabzuni, D., Gibbs, J.R., Ryten, M.,  
476 Arepalli, S., Weale, M.E., et al. (2012). Integration of GWAS SNPs and tissue specific expression  
477 profiling reveal discrete eQTLs for human traits in blood and brain. *Neurobiol. Dis.* *47*, 20–28.
- 478 10. GTEx Consortium (2015). The Genotype-Tissue Expression (GTEx) pilot analysis: Multitissue gene  
479 regulation in humans. *Science* (80-. ). *348*, 648–660.
- 480 11. Ding, J., Gudjonsson, J.E., Liang, L., Stuart, P.E., Li, Y., Chen, W., Weichenthal, M., Ellinghaus, E.,  
481 Franke, A., Cookson, W., et al. (2010). Gene expression in skin and lymphoblastoid cells: Refined  
482 statistical method reveals extensive overlap in cis-eQTL signals. *Am. J. Hum. Genet.* *87*, 779–789.
- 483 12. Nica, A.C., Parts, L., Glass, D., Nisbet, J., Barrett, A., Sekowska, M., Travers, M., Potter, S.,

- 484 Grundberg, E., Small, K., et al. (2011). The architecture of gene regulatory variation across multiple  
485 human tissues: the MuTHER study. *PLoS Genet.* 7, e1002003.
- 486 13. Liu, X., Finucane, H.K., Gusev, A., Bhatia, G., Gazal, S., O'Connor, L., Bulik-Sullivan, B.,  
487 Wright, F., Sullivan, P., Neale, B., et al. (2016). Functional partitioning of local and distal gene  
488 expression regulation in multiple human tissues. *bioRxiv*.
- 489 14. Bulik-Sullivan, B.K., Loh, P.-R., Finucane, H.K., Ripke, S., Yang, J., Patterson, N., Daly, M.J., Price,  
490 A.L., and Neale, B.M. (2015). LD Score regression distinguishes confounding from polygenicity in  
491 genome-wide association studies. *Nat. Genet.* 47, 291–295.
- 492 15. Finucane, H.K., Bulik-Sullivan, B., Gusev, A., Trynka, G., Reshef, Y., Loh, P.-R., Anttila, V., Xu, H.,  
493 Zang, C., Farh, K., et al. (2015). Partitioning heritability by functional annotation using genome-wide  
494 association summary statistics. *Nat. Genet.* 47, 1228–1235.
- 495 16. Brem, R.B., Yvert, G., Clinton, R., and Kruglyak, L. (2002). Genetic dissection of transcriptional  
496 regulation in budding yeast. *Science* 296, 752–755.
- 497 17. Ramasamy, A., Trabzuni, D., Guelfi, S., Varghese, V., Smith, C., Walker, R., De, T., Coin, L., de Silva,  
498 R., Cookson, M.R., et al. (2014). Genetic variability in the regulation of gene expression in ten regions  
499 of the human brain. *Nat. Neurosci.* 17, 1418–1428.
- 500 18. Jansen, R., Hottenga, J.-J., Nivard, M.G., Abdellaoui, A., Laport, B., de Geus, E.J., Wright, F.A.,  
501 Penninx, B.W., and Boomsma, D.I. (2017). Conditional eQTL Analysis Reveals Allelic Heterogeneity of  
502 Gene Expression. *Hum. Mol. Genet.*
- 503 19. Wright, F.A., Sullivan, P.F., Brooks, A.I., Zou, F., Sun, W., Xia, K., Madar, V., Jansen, R., Chung, W.,  
504 Zhou, Y.-H., et al. (2014). Heritability and genomics of gene expression in peripheral blood. *Nat.*  
505 *Genet.* 46, 430–437.
- 506 20. Jostins, L., Ripke, S., Weersma, R.K., Duerr, R.H., McGovern, D.P., Hui, K.Y., Lee, J.C., Schumm, L.P.,  
507 Sharma, Y., and Anderson, C.A. (2012). Host-microbe interactions have shaped the genetic  
508 architecture of inflammatory bowel disease. *Nature* 491, 119–124.
- 509 21. Okada, Y., Wu, D., Trynka, G., Raj, T., Terao, C., Ikari, K., Kochi, Y., Ohmura, K., Suzuki, A., and

- 510 Yoshida, S. (2014). Genetics of rheumatoid arthritis contributes to biology and drug discovery. *Nature*  
511 *506*, 376–381.
- 512 22. Speliotes, E.K., Willer, C.J., Berndt, S.I., Monda, K.L., Thorleifsson, G., Jackson, A.U., Allen, H.L.,  
513 Lindgren, C.M., Luan, J., and Mägi, R. (2010). Association analyses of 249,796 individuals reveal 18  
514 new loci associated with body mass index. *Nat. Genet.* *42*, 937–948.
- 515 23. Rietveld, C.A., Medland, S.E., Derringer, J., Yang, J., Esko, T., Martin, N.W., Westra, H.-J.,  
516 Shakhbazov, K., Abdellaoui, A., and Agrawal, A. (2013). GWAS of 126,559 individuals identifies  
517 genetic variants associated with educational attainment. *Science (80-. )*. *340*, 1467–1471.
- 518 24. Ripke, S., Neale, B.M., Corvin, A., Walters, J.T.R., Farh, K.-H., Holmans, P.A., Lee, P., Bulik-Sullivan,  
519 B., Collier, D.A., Huang, H., et al. (2014). Biological insights from 108 schizophrenia-associated genetic  
520 loci. *Nature* *511*, 421–427.
- 521 25. Perry, J.R.B., Day, F., Elks, C.E., Sulem, P., Thompson, D.J., Ferreira, T., He, C., Chasman, D.I., Esko,  
522 T., and Thorleifsson, G. (2014). Parent-of-origin-specific allelic associations among 106 genomic loci  
523 for age at menarche. *Nature* *514*, 92–97.
- 524 26. Schunkert, H., König, I.R., Kathiresan, S., Reilly, M.P., Assimes, T.L., Holm, H., Preuss, M., Stewart,  
525 A.F.R., Barbalic, M., and Gieger, C. (2011). Large-scale association analysis identifies 13 new  
526 susceptibility loci for coronary artery disease. *Nat. Genet.* *43*, 333–338.
- 527 27. Allen, H.L., Estrada, K., Lettre, G., Berndt, S.I., Weedon, M.N., Rivadeneira, F., Willer, C.J., Jackson,  
528 A.U., Vedantam, S., and Raychaudhuri, S. (2010). Hundreds of variants clustered in genomic loci and  
529 biological pathways affect human height. *Nature* *467*, 832–838.
- 530 28. Teslovich, T.M., Musunuru, K., Smith, A. V, Edmondson, A.C., Stylianou, I.M., Koseki, M.,  
531 Pirruccello, J.P., Ripatti, S., Chasman, D.I., and Willer, C.J. (2010). Biological, clinical and population  
532 relevance of 95 loci for blood lipids. *Nature* *466*, 707–713.
- 533 29. Furberg, H., Kim, Y., Dackor, J., Boerwinkel, E., Franceschini, N., Ardissino, D., Bernardinelli, L.,  
534 Mannucci, P.M., Maur, F., Merlini, P.A., et al. (2010). Genome-wide meta-analyses identify multiple  
535 loci associated with smoking behavior. *Nat. Genet.* *42*, 441–447.

- 536 30. Vimalaewaran, K.S., Tachmazidou, I., Zhao, J.H., Hirschhorn, J.N., Dudbridge, F., and Loos, R.J.F.  
537 (2012). Candidate genes for obesity-susceptibility show enriched association within a large genome-  
538 wide association study for BMI. *Hum. Mol. Genet.* *21*, 4537–4542.
- 539 31. Andreassen, O.A., Harbo, H.F., Wang, Y., Thompson, W.K., Schork, A.J., Mattingsdal, M., Zuber, V.,  
540 Bettella, F., Ripke, S., Kelsoe, J.R., et al. (2015). Genetic pleiotropy between multiple sclerosis and  
541 schizophrenia but not bipolar disorder: differential involvement of immune-related gene loci. *Mol.*  
542 *Psychiatry* *20*, 207–214.
- 543 32. Karalis, K.P., Giannogonas, P., Kodela, E., Koutmani, Y., Zoumakis, M., and Teli, T. (2009).  
544 Mechanisms of obesity and related pathology: linking immune responses to metabolic stress. *FEBS J.*  
545 *276*, 5747–5754.
- 546 33. Willemsen, G., De Geus, E.J.C., Bartels, M., Van Beijsterveldt, C.E.M., Brooks, A.I., Estourgie-van  
547 Burk, G.F., Fugman, D.A., Hoekstra, C., Hottenga, J.-J., and Kluft, K. (2010). The Netherlands Twin  
548 Register biobank: a resource for genetic epidemiological studies. *Twin Res. Hum. Genet.* *13*, 231–245.
- 549 34. Willemsen, G., Vink, J.M., Abdellaoui, A., den Braber, A., van Beek, J.H.D.A., Draisma, H.H.M., van  
550 Dongen, J., van't Ent, D., Geels, L.M., and van Lien, R. (2013). The Adult Netherlands Twin Register:  
551 twenty-five years of survey and biological data collection. *Twin Res. Hum. Genet.* *16*, 271–281.
- 552 35. Penninx, B.W.J.H., Beekman, A.T.F., Smit, J.H., Zitman, F.G., Nolen, W.A., Spinhoven, P., Cuijpers, P.,  
553 De Jong, P.J., Van Marwijk, H.W.J., and Assendelft, W.J.J. (2008). The Netherlands Study of Depression  
554 and Anxiety (NESDA): rationale, objectives and methods. *Int. J. Methods Psychiatr. Res.* *17*, 121–140.
- 555 36. Bulik-Sullivan, B.K., and Finucane, H.K. (2015). LD Score Estimation Tutorial.
- 556 37. Allis, C.D., and Jenuwein, T. (2016). The molecular hallmarks of epigenetic control. *Nat Rev Genet*  
557 *17*, 487–500.
- 558 38. Zhou, V.W., Goren, A., and Bernstein, B.E. (2011). Charting histone modifications and the  
559 functional organization of mammalian genomes. *Nat Rev Genet* *12*, 7–18.
- 560 39. Finucane, H., Reshef, Y., Anttila, V., Slowikowski, K., Gusev, A., Byrnes, A., Gazal, S., Loh, P.-R.,  
561 Genovese, G., Saunders, A., et al. (2017). Heritability enrichment of specifically expressed genes

562 identifies disease-relevant tissues and cell types. bioRxiv.

563 40. Gamazon, E.R., Wheeler, H.E., Shah, K.P., Mozaffari, S. V, Aquino-Michaels, K., Carroll, R.J., Eyer,

564 A.E., Denny, J.C., Nicolae, D.L., Cox, N.J., et al. (2015). A gene-based association method for mapping

565 traits using reference transcriptome data. *Nat. Genet.* *47*, 1091–1098.

566 41. Gusev, A., Ko, A., Shi, H., Bhatia, G., Chung, W., Penninx, B.W.J.H., Jansen, R., de Geus, E.J.C.,

567 Boomsma, D.I., Wright, F.A., et al. (2016). Integrative approaches for large-scale transcriptome-wide

568 association studies. *Nat. Genet.* *48*, 245–252.

569 42. Grundberg, E., Small, K.S., Hedman, Å.K., Nica, A.C., Buil, A., Keildson, S., Bell, J.T., Yang, T.-P.,

570 Meduri, E., Barrett, A., et al. (2012). Mapping cis- and trans-regulatory effects across multiple tissues

571 in twins. *Nat. Genet.* *44*, 1084–1089.

572 43. Benaglia, T., Chauveau, D., Hunter, D., and Young, D. (2009). mixtools: An R Package for Analyzing

573 Finite Mixture Models. *J. Stat. Softw.* *32*, 1–29.

574

575



576 **Figure Titles and Legends**

577 **Figure 1. Average enrichment in GWAS signal of the 24 baseline annotations, 4 brain eQTL**  
578 **annotations and 4 blood eQTL annotations.**

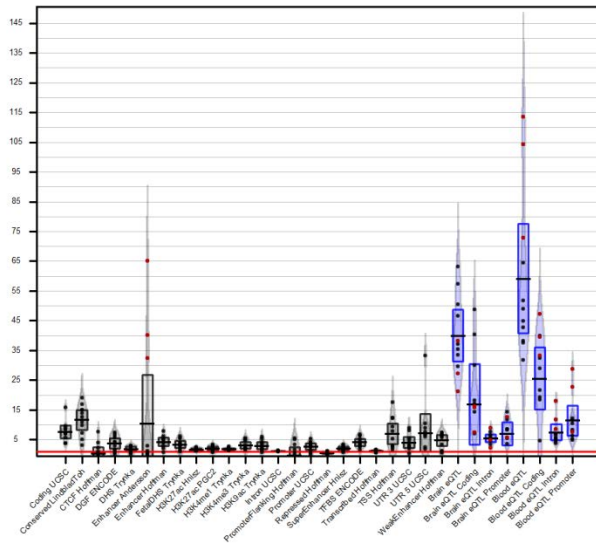

579

580 Violin plot of the average enrichment in GWAS signal across all traits for the 24 main baseline

581 annotations and 8 main eQTL annotations. Grey beans represent the baseline categories. Blue beans

582 represent eQTLs. Black bars indicate average enrichment. Boxes show upper- and lower-bounds of

583 the 95% confidence interval of the mean. Red dots show enrichments for immune-related traits.

584 Horizontal red line indicates enrichment of 1, i.e. no enrichment.

585

586

587 **Figure 2. Coefficient Z-scores of the 45 GTEx annotations**

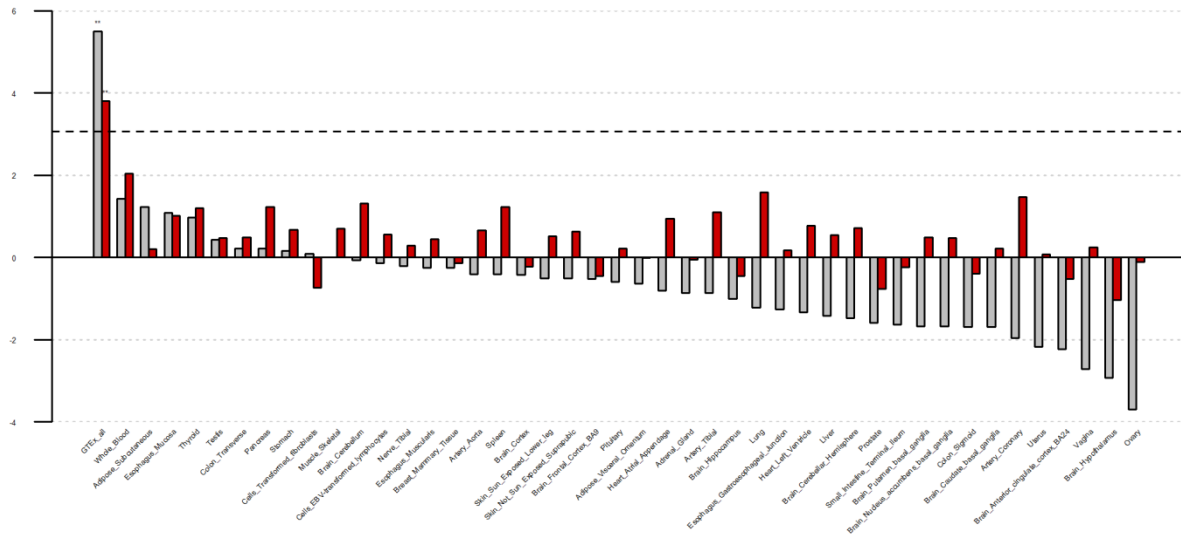

588

589 Barplot of coefficient z-scores for all GTEx annotations for schizophrenia (grey) and rheumatoid

590 arthritis (red). Bars are sorted from highest to lowest based on the results from schizophrenia.

591 Horizontal dotted line indicates Bonferroni threshold for 45 tests. Two asterisks indicate bars passing

592 Bonferroni correction for multiple testing.

593

594

595 **Figure 3. Coefficient Z-score of intersection between union of GTEx eQTLs and cell-type-specific**  
 596 **histone marks**

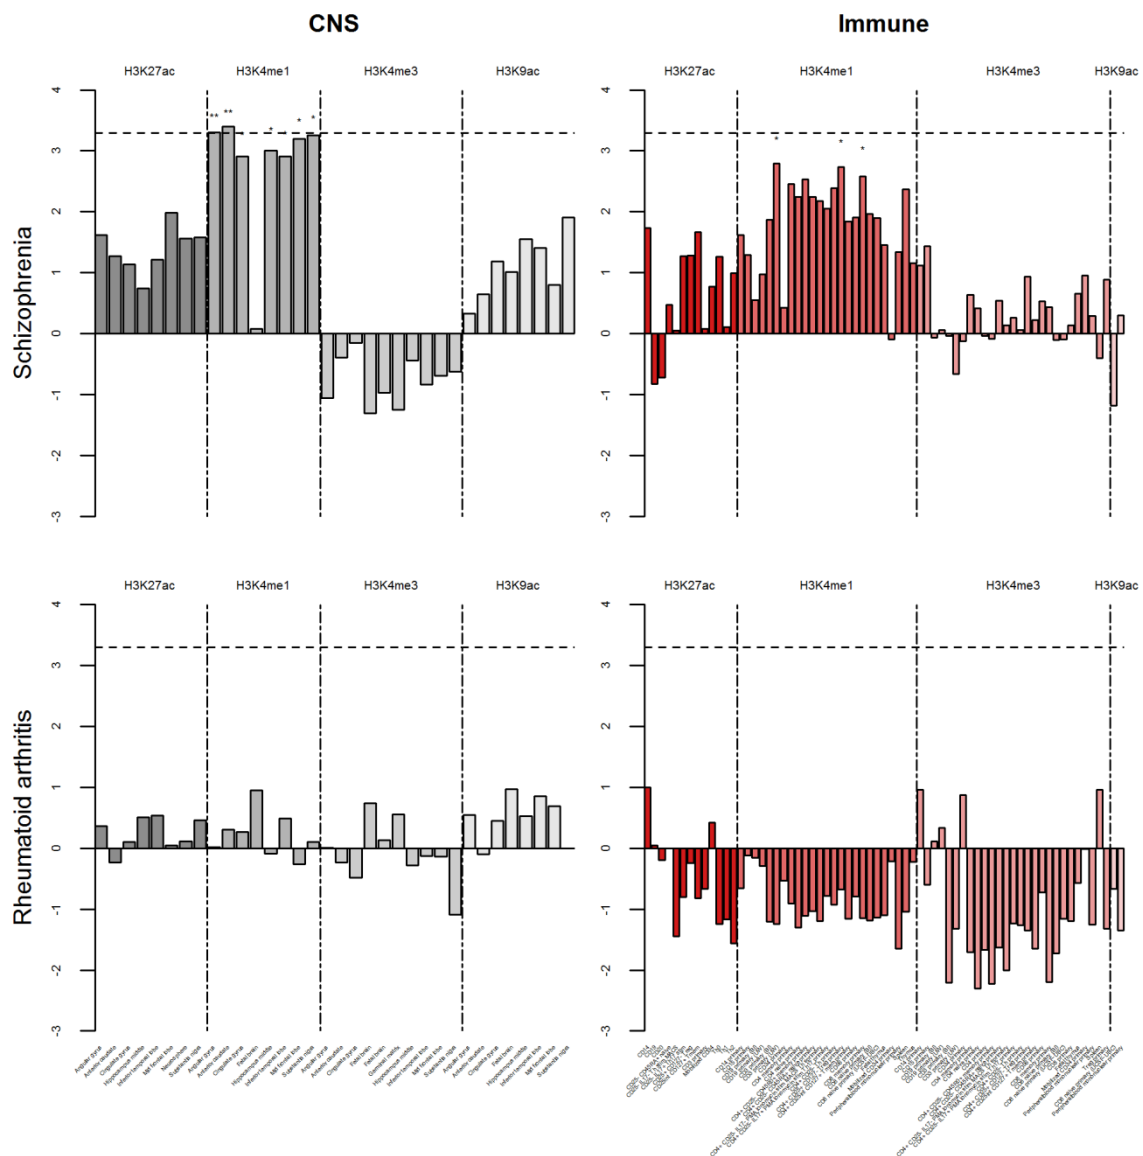

597  
 598 Top two graphs show coefficient Z-scores for schizophrenia. Bottom two graphs show the same for  
 599 rheumatoid arthritis. Grey bars indicate histone marks found in cells from the central nervous  
 600 system. Red bars represent histone marks found in cells from the immune system. From dark to light,  
 601 shades of the bars indicate histone marks H3K27ac, H3K4me1, H3K4me3, and H3K9ac. Vertical  
 602 dotted lines indicate separation between histone marks. One asterisk above the bars indicate  
 603 annotations passing FDR correction for multiple testing. Two asterisks indicate bars passing

604 Bonferroni correction for multiple testing. Horizontal dotted line indicates Bonferroni threshold for  
 605 101 tests.

606

## 607 Tables

608 **Table 1. Coefficient Z-scores of simultaneously modelling complete and unique eQTLs**

|               | Trait                   | Complete brain eQTL | Unique brain eQTL | Complete blood eQTL | Unique blood eQTL |
|---------------|-------------------------|---------------------|-------------------|---------------------|-------------------|
| <b>Immune</b> | Crohn's disease         | 3.257 (<0.001)**    | 0.049 (0.520)     | 1.593 (0.056)       | 0.311 (0.622)     |
|               | Rheumatoid arthritis    | 2.474 (0.007)*      | -1.576 (0.057)    | 2.297 (0.011)*      | -0.243 (0.404)    |
|               | Ulcerative colitis      | 0.600 (0.274)       | -1.969 (0.024)    | 2.550 (0.005)*      | 0.415 (0.661)     |
| <b>Brain</b>  | BMI                     | 4.260 (<0.001)**    | 0.109 (0.544)     | 3.088 (0.001)**     | -0.954 (0.170)    |
|               | Educational attainment  | 3.454 (<0.001)**    | -2.882 (0.002)**  | 1.961 (0.025)*      | -2.710 (0.003)**  |
|               | Schizophrenia           | 5.041 (<0.001)**    | -3.772 (<0.001)** | 5.000 (<0.001)**    | -2.619 (0.004)**  |
| <b>Other</b>  | Age at menarche         | 3.155 (<0.001)**    | -1.964 (0.025)    | 2.916 (0.002)**     | -1.176 (0.120)    |
|               | Coronary artery disease | 2.184 (0.014)*      | -1.309 (0.095)    | 1.509 (0.066)       | -0.094 (0.463)    |
|               | Height                  | 4.319 (<0.001)**    | -0.337 (0.368)    | 3.782 (<0.001)**    | -2.156 (0.016)    |
|               | LDL level               | 2.135 (0.016)*      | -0.806 (0.210)    | 2.003 (0.023)*      | 0.391 (0.652)     |
|               | Smoking behavior        | 0.969 (0.166)       | 0.514 (0.696)     | 0.880 (0.189)       | 0.876 (0.810)     |

609 Z-scores associated with specific annotations in SLDSR models that distinguish enrichment in GWAS

610 signal of unique from all eQTLs in a tissue. Values between brackets show the corresponding *p*-

611 values. One asterisk indicates coefficients passing FDR correction for multiple testing. Two asterisks

612 indicate coefficients passing Bonferroni correction for multiple testing. Negative z-score means

613 depletion (i.e. unique eQTLs have less effect than eQTLs present in brain and blood) positive z-score

614 means enrichment. Unique brain eQTLs were not significantly depleted compared to brain eQTLs in

615 strong LD with blood eQTLs in their effect on all three immune-traits (Table 1 left panel). Unique

616 brain eQTLs were significantly depleted in their effect on schizophrenia and educational attainment

617 compared to the complete brain eQTL annotation, but not for BMI.
